# Supplementary material for: Coupled transport of Arabidopsis p24 proteins at the ER–Golgi interface
Source: PubMed Central journal article supplement — J Exp Bot. 2012 May 10;63(11):4243–61. doi: 10.1093/jxb/ers112 (PMC3398454; doi:10.1093/jxb/ers112), 2012-05-10
Supplement: supp_ers112_00075440-file001.pdf [file supp_ers112_00075440-file001.pdf]

# COUPLED TRANSPORT OF ARABIDOPSIS p24 PROTEINS AT THE ER-GOLGI INTERFACE

Juan Carlos Montesinos\*<sup>1</sup>, Silke Sturm\*<sup>2</sup>, Markus Langhans<sup>2</sup>, Stefan Hillmer<sup>2</sup>, María Jesús Marcote<sup>1</sup>, David G. Robinson<sup>2</sup> and Fernando Aniento<sup>1,#</sup>

## SUPPLEMENTARY MATERIAL

### Figure S1. Nt- and Ct-sequences of Arabidopsis p24 proteins.

Sequence of the N-terminus and the C-terminus of the 11 members of the p24 family in Arabidopsis, including those from the delta subfamily (p24 $\delta$ 3-p24 $\delta$ 11) and those from the beta subfamily (p24 $\beta$ 2-p24 $\beta$ 3). Sequences used to obtain peptide antibodies are underlined.

### Figure S2. Characterization of T-DNA insertion mutants.

A. RT-PCR analysis of *p24 $\delta$ 5-1*, *p24 $\delta$ 4-1* mutants to show the absence of *p24 $\delta$ 5* and *p24 $\delta$ 4* mRNA, respectively. Total RNA from leaves of the T-DNA insertion mutant and wild-type plants were used for the RT-PCR. In the PCRs, gene specific primers were used. *Actin7* (*ACT7*) was used as a control. B. *p24 $\delta$ 5-1*, *p24 $\delta$ 4-1* and *p24 $\delta$ 4 $\delta$ 5* mutant seedlings grown on vertical agar plates for 6 days did not show a phenotype different from that of wild-type (Col-0)

plants. C. Three-week-old *p24 $\delta$ 5-1*, *p24 $\delta$ 4-1* and *p24 $\delta$ 4 $\delta$ 5* mutant plants did not show a phenotype different from that of wild-type (Col-0) plants.

**Figure S3. Localization of RFP-p24 $\delta$ 5 and deletion mutants and colocalization between GFP-p24 $\beta$ 2 and RFP-p24 $\delta$ 5 or RFP-p24 $\delta$ 5( $\Delta$ CC) in *Arabidopsis* protoplasts.**

A-L. Transient gene expression in *Arabidopsis* protoplasts. A-C. RFP-p24 $\delta$ 5 (A) shows a typical ER pattern and colocalizes with the ER marker GFP-HDEL (B) (merged image in C). D-F. RFP-p24 $\delta$ 5 deletion mutants lacking the coiled-coil domain ( $\Delta$ CC) (D), the GOLD domain ( $\Delta$ GOLD) (E) or both (TMCT) (F) show a typical ER pattern and colocalize with the ER marker GFP-HDEL. G-I. GFP-p24 $\beta$ 2 (G) and RFP-p24 $\delta$ 5 (H) colocalize in punctate structures (see merged images in I). J-L. GFP-p24 $\beta$ 2 (J) and RFP-p24 $\delta$ 5 ( $\Delta$ CC) (K) do not colocalize (see merged image in L). Scale bars = 5  $\mu$ m.

**Figure S4. RFP-p24 $\delta$ 5 and RFP-p24 $\delta$ 5 ( $\Delta$ CC) localize to the ER at different expression levels.**

A-P. Transient gene expression in tobacco mesophyll protoplasts using the indicated concentrations of DNA (from 0.3 to 10  $\mu$ g). A-H. RFP-p24 $\delta$ 5 shows a typical ER pattern at all DNA concentrations and both at 5 (A-D) or 24 (E-H) hours post-electroporation. I-P. RFP-p24 $\delta$ 5( $\Delta$ CC) shows a typical ER pattern at all DNA concentrations and both at 5 (I-L) or 24 (M-P) hours post-electroporation. Scale bars = 5  $\mu$ m.

**Figure S5. Co-expression of RFP-p24 $\delta$ 5 and different DNA concentrations of GFP-p24 $\beta$ 2.**

A-I. Transient gene expression in tobacco mesophyll protoplasts. An increased ratio in the concentrations of GFP-p24 $\beta$ 2 (A, 5  $\mu$ g; D, 25  $\mu$ g; G, 50  $\mu$ g) vs RFP-p24 $\delta$ 5 (35  $\mu$ g, B, E and H) induces a progressive change in the localization of RFP-p24 $\delta$ 5, from a mainly reticulate pattern (B) to a mostly punctate one (H), and increased colocalization between both proteins (merged images in C, F and I). Scale bars = 5  $\mu$ m.

**Figure S6. Co-expression of RFP-p24 $\delta$ 5( $\Delta$ CC) and different DNA concentrations of GFP-p24 $\beta$ 2.**

A-I. Transient gene expression in tobacco mesophyll protoplasts. An increased ratio in the concentrations of GFP-p24 $\beta$ 2 (A, 5  $\mu$ g; D, 25  $\mu$ g; G, 50  $\mu$ g) vs RFP-p24 $\delta$ 5 ( $\Delta$ CC) (35  $\mu$ g, B, E and H) does not change the reticulate pattern of RFP-p24 $\delta$ 5 (merged images in C, F and I). Scale bars = 5  $\mu$ m.

**Figure S7. 2 h BFA treatment redistributes RFP-p24 $\delta$ 5 and GFP-p24 $\beta$ 2 to the ER.**

A-C. Transient gene expression in tobacco mesophyll protoplasts. Treatment with BFA (90  $\mu$ M, 120 min) after coexpression of GFP-p24 $\beta$ 2 (A) and RFP-p24 $\delta$ 5 (B) may induce a complete relocalization of both proteins to the ER (merged image in C). Scale bars = 5  $\mu$ m.

**Figure S8. A comparison between frame scan and line scan modes for colocalization studies.** A-L. Transient gene expression in tobacco mesophyll protoplasts. A-F. GFP-p24 $\beta$ 2 (A, D) colocalizes partially with the Golgi marker Man1-RFP (B, E) in punctate structures (merged images in C and F), both in the frame scan mode (A-C) and in the line scan mode (D-F). G-L. GFP-p24 $\beta$ 2 (G, J) punctae do not colocalize with the PVC marker ARA6-RFP (H, K) (merged images in I and L), neither in the frame scan mode (G-I) nor in the line scan mode (J-L).

## Figure S1

|                 | <u>N-terminus</u> | <u>C-terminus</u>   |
|-----------------|-------------------|---------------------|
| p24 $\delta$ 3  | VWLDVPPTGT        | YLKQYFEKKKLI        |
| p24 $\delta$ 4  | VWLTVPHTGS        | YLKQYFEKKKLI        |
| p24 $\delta$ 5  | <u>IWLTIPTTGG</u> | <u>YLKRYFHKKKLI</u> |
| p24 $\delta$ 6  | IWLTVPESGE        | YLKRYFLKKKLI        |
| p24 $\delta$ 7  | IRYELLSGHT        | HLKTFFQKKKLI        |
| p24 $\delta$ 8  | MRYELKSSKT        | HLKTFFEKKKLI        |
| p24 $\delta$ 9  | LHFELQSGRT        | HLKTFFEKKKVI        |
| p24 $\delta$ 10 | LHFDLHSGRT        | HLKTFFEKKKVI        |
| p24 $\delta$ 11 | MRLDMESGNT        | HLKSFLERKKLL        |
| <br>            |                   |                     |
| p24 $\beta$ 2   | <u>IRFVIDREE</u>  | <u>LFERKLGMSRV</u>  |
| p24 $\beta$ 3   | <u>LSVTVNDEE</u>  | <u>LFSKSVAYNRV</u>  |

### Figure S1. Nt- and Ct-sequences of Arabidopsis p24 proteins.

Sequence of the N-terminus and the C-terminus of the 11 members of the p24 family in Arabidopsis, including those from the delta subfamily (p24 $\delta$ 3-p24 $\delta$ 11) and those from the beta subfamily (p24 $\beta$ 2-p24 $\beta$ 3). Sequences used to obtain peptide antibodies are underlined.

## Figure S2

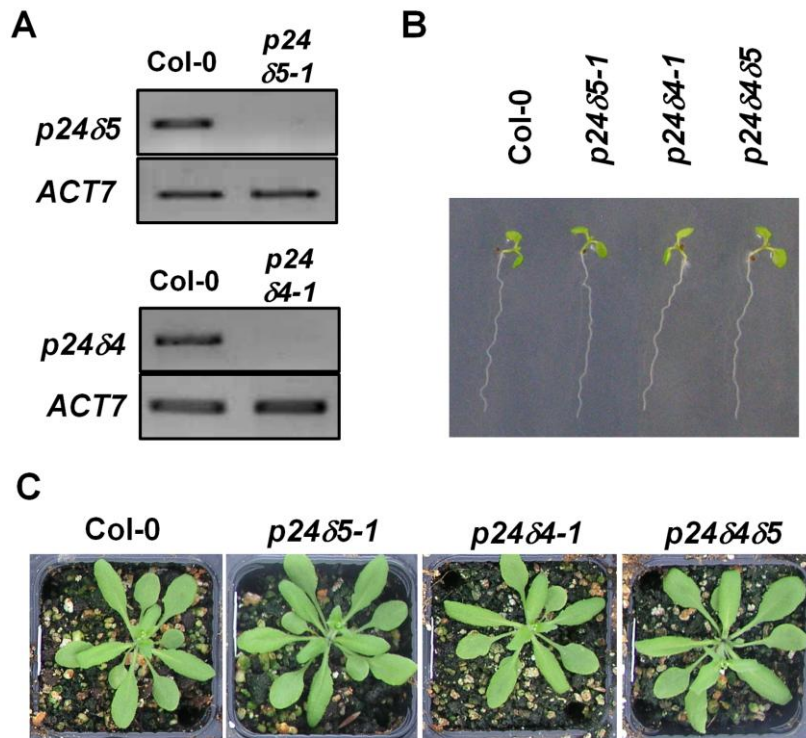

### Figure S2. Characterization of T-DNA insertion mutants.

A. RT-PCR analysis of *p24δ5-1*, *p24δ4-1* mutants to show the absence of *p24δ5* and *p24δ4* mRNA, respectively. Total RNA from leaves of the T-DNA insertion mutant and wild-type plants were used for the RT-PCR. In the PCRs, gene specific primers were used. *Actin7* (*ACT7*) was used as a control. B. *p24δ5-1*, *p24δ4-1* and *p24δ4δ5* mutant seedlings grown on vertical agar plates for 6 days did not show a phenotype different from that of wild-type (Col-0) plants. C. Three-week-old *p24δ5-1*, *p24δ4-1* and *p24δ4δ5* mutant plants did not show a phenotype different from that of wild-type (Col-0) plants.

Figure S3

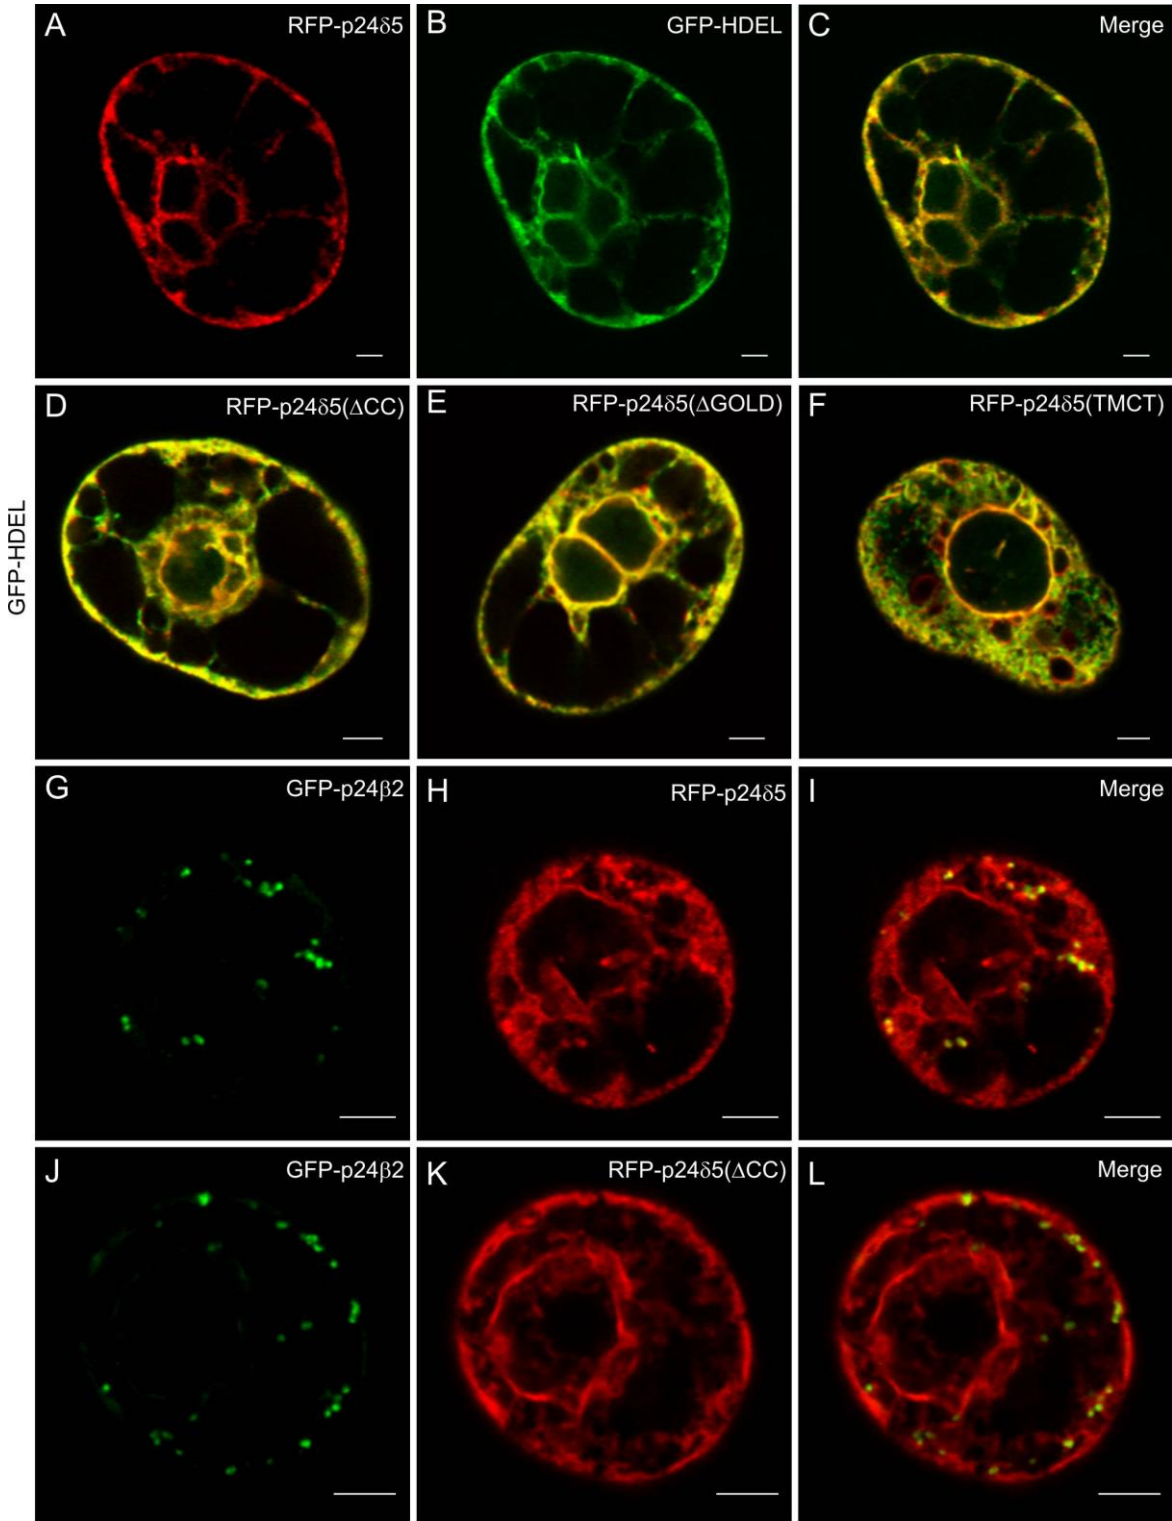

**Figure S3. Localization of RFP-p24 $\delta$ 5 and deletion mutants and colocalization between GFP-p24 $\beta$ 2 and RFP-p24 $\delta$ 5 or RFP-p24 $\delta$ 5( $\Delta$ CC) in *Arabidopsis* protoplasts.**

A-L. Transient gene expression in *Arabidopsis* protoplasts. A-C. RFP-p24 $\delta$ 5 (A) shows a typical ER pattern and colocalizes with the ER marker GFP-HDEL (B) (merged image in C). D-F. RFP-p24 $\delta$ 5 deletion mutants lacking the coiled-coil domain ( $\Delta$ CC) (D), the GOLD domain ( $\Delta$ GOLD) (E) or both (TMCT) (F) show a typical ER pattern and colocalize with the ER marker GFP-HDEL. G-I. GFP-p24 $\beta$ 2 (G) and RFP-p24 $\delta$ 5 (H) colocalize in punctate structures (see merged images in I). J-L. GFP-p24 $\beta$ 2 (J) and RFP-p24 $\delta$ 5 ( $\Delta$ CC) (K) do not colocalize (see merged image in L). Scale bars = 5  $\mu$ m.



## Figure S4

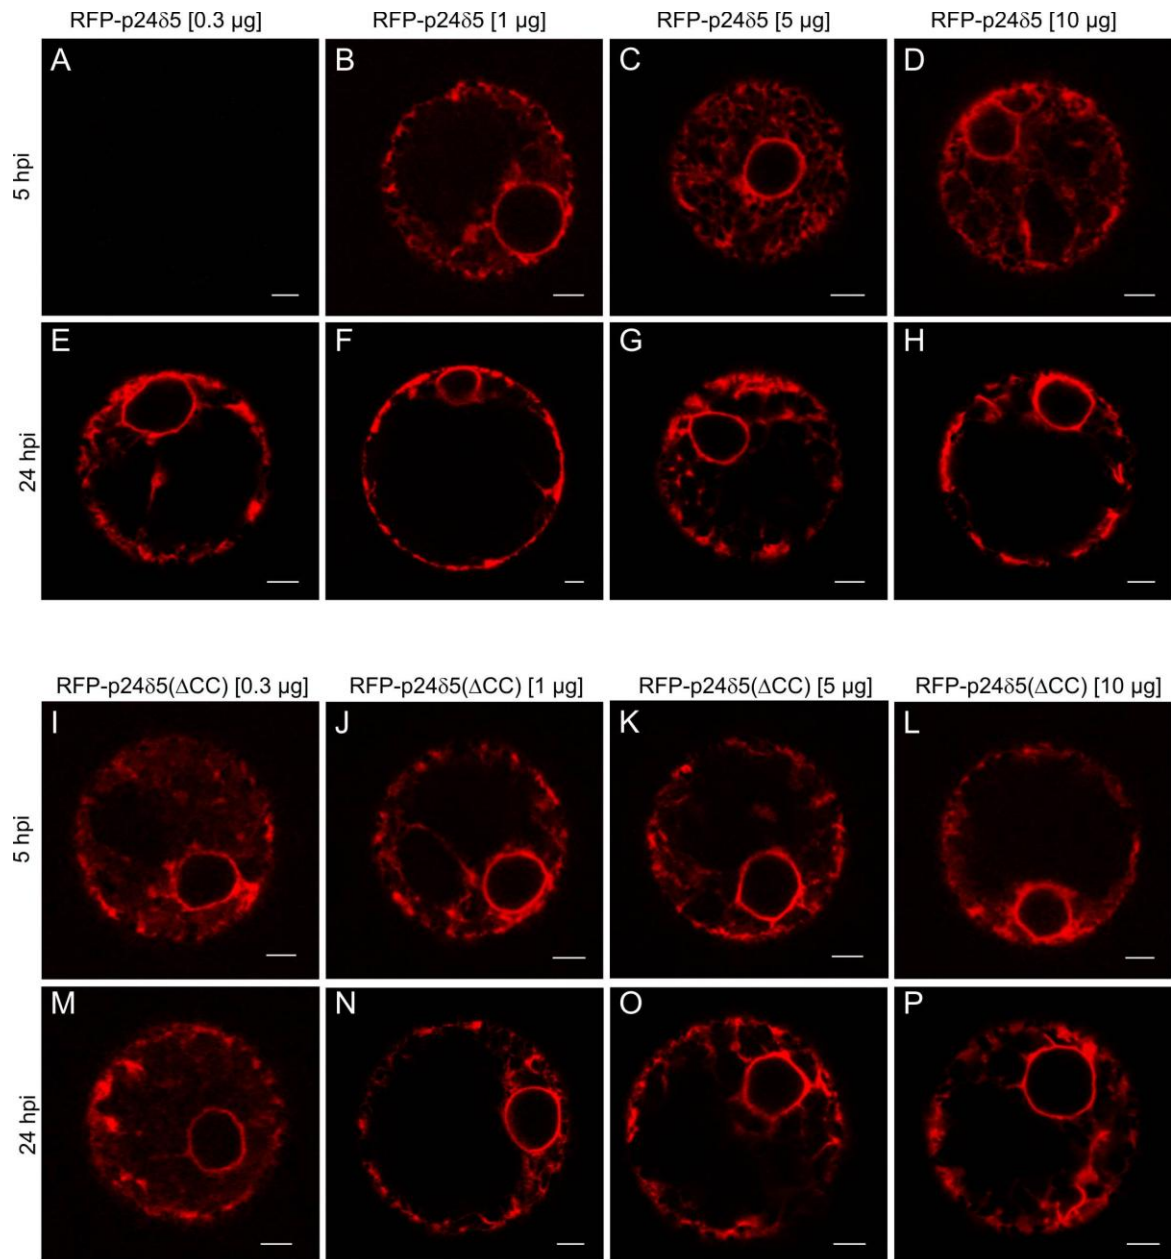

**Figure S4. RFP-p24 $\delta$ 5 and RFP-p24 $\delta$ 5 ( $\Delta$ CC) localize to the ER at different expression levels.**

A-P. Transient gene expression in tobacco mesophyll protoplasts using the indicated concentrations of DNA (from 0.3 to 10  $\mu$ g). A-H. RFP-p24 $\delta$ 5 shows a typical ER pattern at all DNA concentrations and both at 5 (A-D) or 24 (E-H) hours post-electroporation. I-P. RFP-p24 $\delta$ 5( $\Delta$ CC) shows a typical ER pattern at all DNA concentrations and both at 5 (I-L) or 24 (M-P) hours post-electroporation. Scale bars = 5  $\mu$ m.

## Figure S5

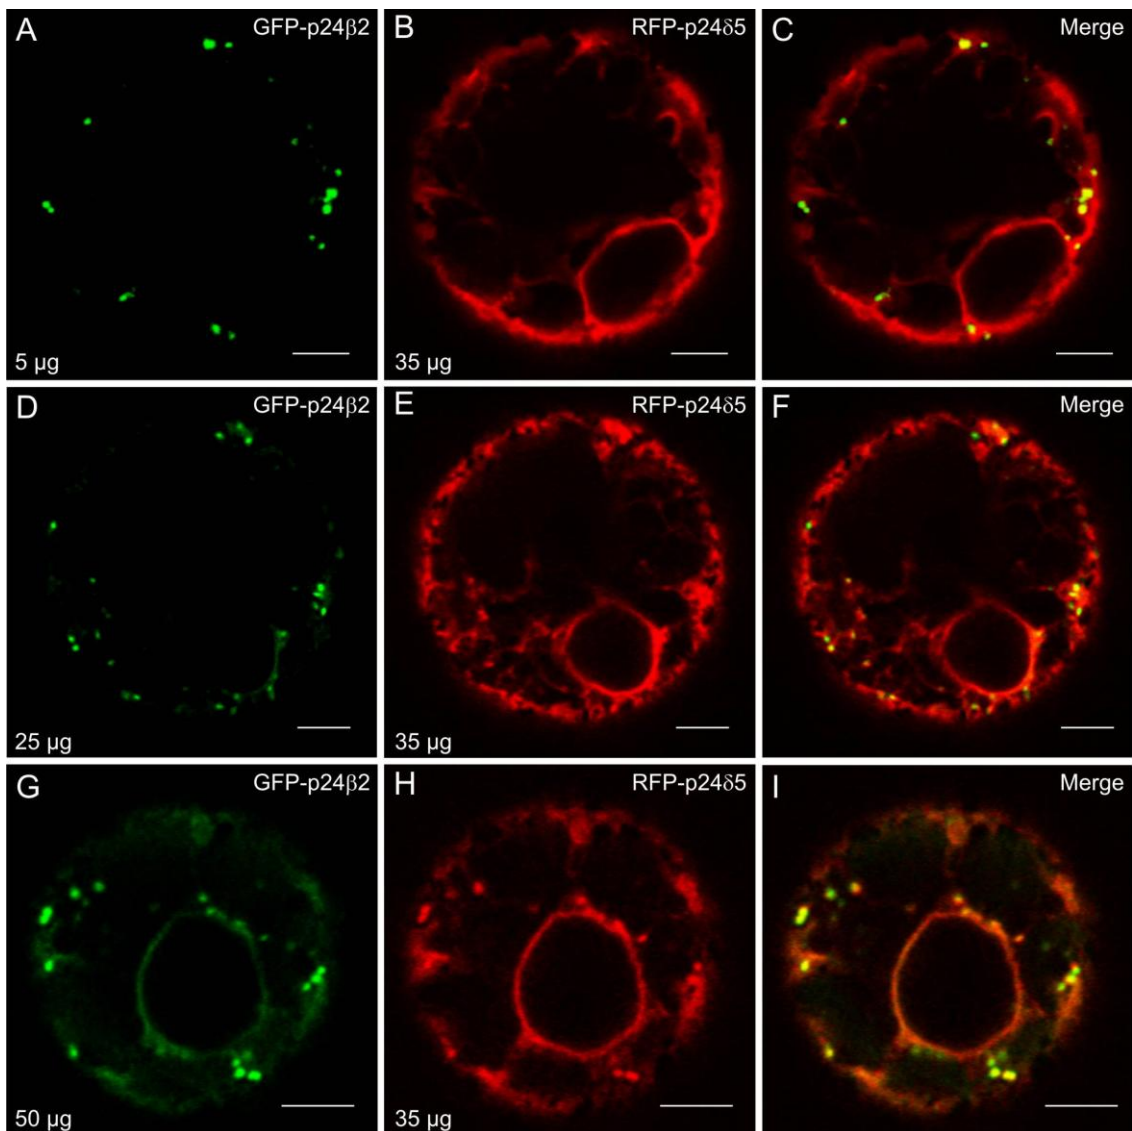

**Figure S5. Co-expression of RFP-p24 $\delta$ 5 and different DNA concentrations of GFP-p24 $\beta$ 2.**

A-I. Transient gene expression in tobacco mesophyll protoplasts. An increased ratio in the concentrations of GFP-p24 $\beta$ 2 (A, 5  $\mu$ g; D, 25  $\mu$ g; G, 50  $\mu$ g) vs RFP-p24 $\delta$ 5 (35  $\mu$ g, B, E and H) induces a progressive change in the localization of RFP-p24 $\delta$ 5, from a mainly reticulate pattern (B) to a mostly punctate one (H), and increased colocalization between both proteins (merged images in C, F and I). Scale bars = 5  $\mu$ m.

## Figure S6

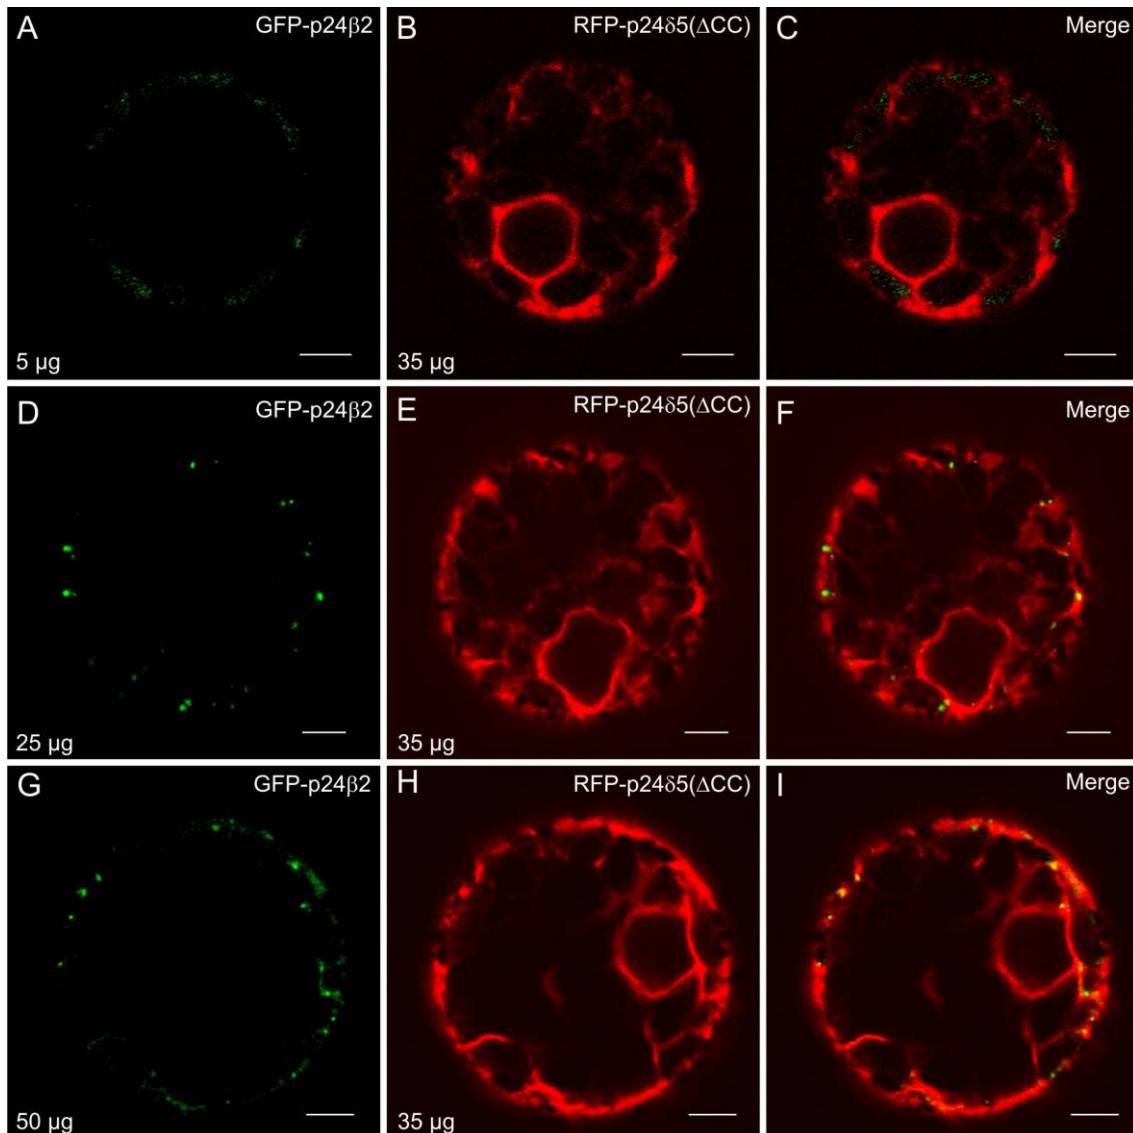

**Figure S6. Co-expression of RFP-p24 $\delta$ 5( $\Delta$ CC) and different DNA concentrations of GFP-p24 $\beta$ 2.**

A-I. Transient gene expression in tobacco mesophyll protoplasts. An increased ratio in the concentrations of GFP-p24 $\beta$ 2 (A, 5  $\mu$ g; D, 25  $\mu$ g; G, 50  $\mu$ g) vs RFP-p24 $\delta$ 5 ( $\Delta$ CC) (35  $\mu$ g, B, E and H) does not change the reticulate pattern of RFP-p24 $\delta$ 5 (merged images in C, F and I). Scale bars = 5  $\mu$ m.

## Figure S7

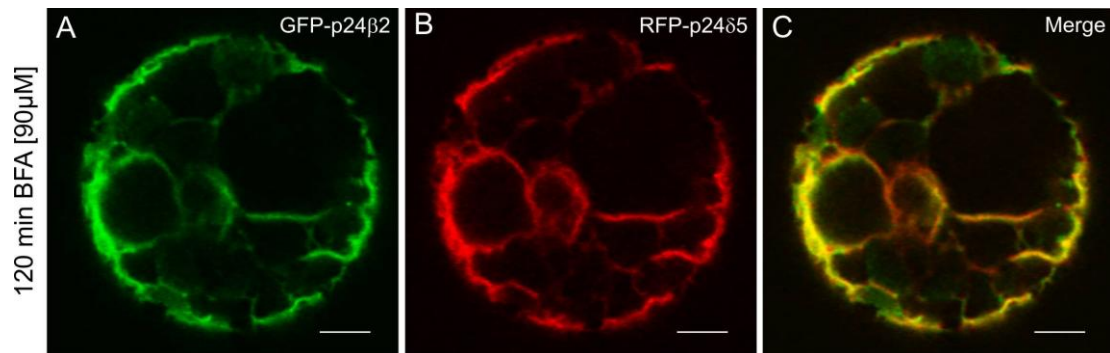

### Figure S7. 2 h BFA treatment redistributes RFP-p24δ5 and GFP-p24β2 to the ER.

A-C. Transient gene expression in tobacco mesophyll protoplasts. Treatment with BFA (90 μM, 120 min) after coexpression of GFP-p24β2 (A) and RFP-p24δ5 (B) may induce a complete relocation of both proteins to the ER (merged image in C). Scale bars = 5 μm.

Figure S8

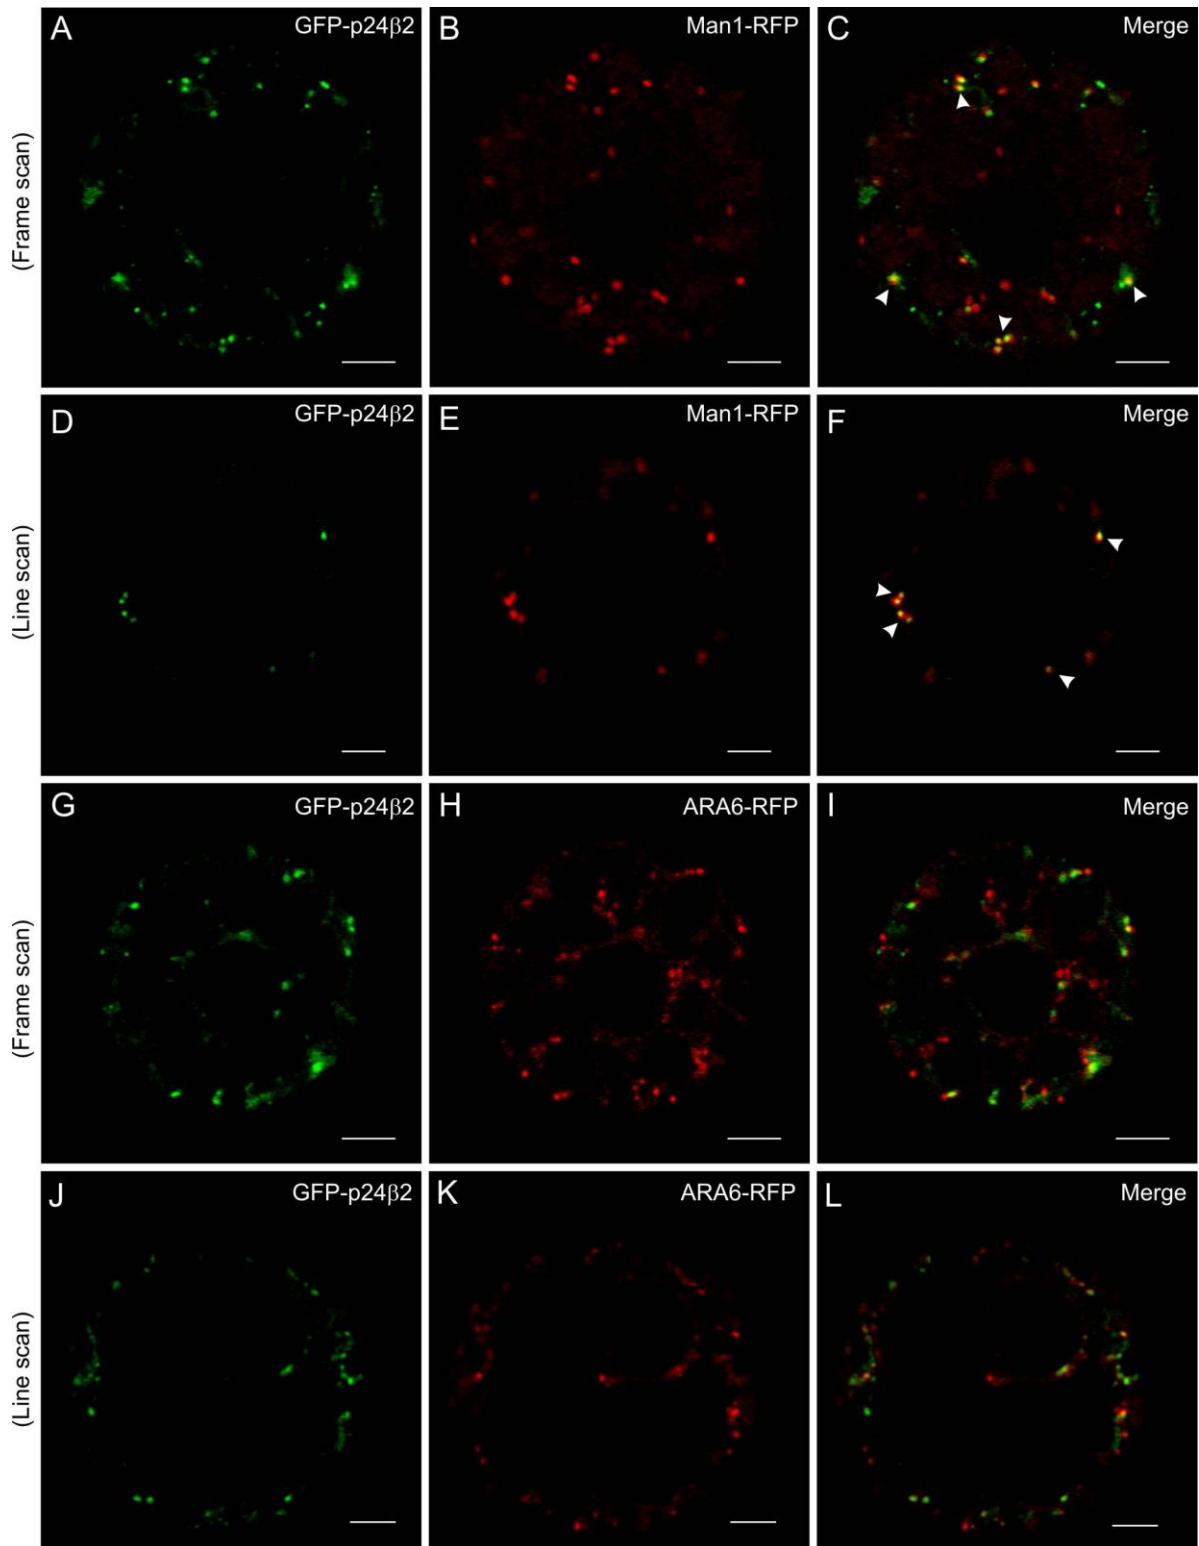

**Figure S8. A comparison between frame scan and line scan modes for colocalization studies.** A-L. Transient gene expression in tobacco mesophyll protoplasts. A-F. GFP-p24 $\beta$ 2 (A, D) colocalizes partially with the Golgi marker Man1-RFP (B, E) in punctate structures (merged images in C and F), both in the frame scan mode (A-C) and in the line scan mode (D-F). G-L. GFP-p24 $\beta$ 2 (G, J) punctae do not colocalize with the PVC marker ARA6-RFP (H, K) (merged images in I and L), neither in the frame scan mode (G-I) nor in the line scan mode (J-L).
